# Supplementary material for: Development of Bactericidal Peptides against Multidrug-Resistant Acinetobacter baumannii with Enhanced Stability and Low Toxicity
Source: MDPI journal article supplement (doi:10.3390/ijms23042191), 2022-02-16
Supplement: s1 [file s1]

# Development of Bactericidal Peptides against Multidrug Resistant *Acinetobacter Baumannii* with Enhanced Stability and Low Toxicity

Author and affiliation

Prakash Kishore Hazam <sup>1,†</sup>, Chin-Cheng Cheng <sup>2,†</sup>, Chu-Yi Hsieh <sup>1</sup>, Wen-Chun Lin <sup>1</sup>, Po-Hsien Hsu <sup>2</sup>, Te-Li Chen <sup>3,4</sup>, Yi-Tzu Lee <sup>5,6</sup> and Jyh-Yih Chen <sup>1,7,\*</sup>

<sup>1</sup> Marine Research Station, Institute of Cellular and Organismic Biology, Academia Sinica, 23-10 Dahuen Rd., Jiaushi, Ilan 262, Taiwan; prakashkishor.hazam@gmail.com (P.K.H.); joy.cde49@gmail.com (C.-Y.H.); hagirl19@gmail.com (W.-C.L.)

<sup>2</sup> Institute of Fisheries Science, National Taiwan University, 1 Roosevelt Road, Sec. 4, Taipei 106, Taiwan; eddie040886@gmail.com (C.-C.C.); ericchu102001@gmail.com (P.-H.H.)

<sup>3</sup> Graduate Institute of Life Sciences, National Defense Medical Center, 114, Taipei, Taiwan; tecklayyy@gmail.com

<sup>4</sup> Institute of Clinical Medicine, School of Medicine, National Yang-Ming University, 112-21, Taipei, Taiwan

<sup>5</sup> Department of Emergency Medicine, Taipei Veterans General Hospital, No.201, Section 2, Shipai Road, Taipei 11217, Taiwan; s851009@yahoo.com.tw

<sup>6</sup> Faculty of Medicine, School of Medicine, National Yang-Ming University, No.155, Sec.2, Linong Street, Taipei 11221, Taiwan

<sup>7</sup> The iEGG and Animal Biotechnology Center and the Rong Hsing Research Center for Translational Medicine, National Chung Hsing University, Taichung 402, Taiwan

\* Correspondence: zoocjy@gate.sinica.edu.tw

† These authors contributed equally.

## Supplementary information

**Supplementary Table S1:** Details of antibiotic resistance of the selected MDR *Acinetobacter baumannii* bacterial species obtained as a gift sample from the hospital.

| S | Bact  | Mult | OX    | OX    | Ami  | Ampi    | Cefe | Ceftaz | Ciprofl | Coli | D  | Genta | Imip | Minoc  | Mero | Pipera  | Sulba | Tigec  |
|---|-------|------|-------|-------|------|---------|------|--------|---------|------|----|-------|------|--------|------|---------|-------|--------|
| n | eria  | plex | A51   | A58   | kaci | cillin- | pime | idime  | oxacin  | stin | O  | micin | enem | ycline | pene | cillin- | ctam  | ycline |
| o | strai | PCR  | -like | -like | n    | -sulba  |      |        |         |      | R  |       |      |        | m    | Tazob   |       |        |
|   | n     |      |       |       |      | ctam    |      |        |         |      |    |       |      |        |      | actam   |       |        |
|   | num   |      |       |       |      |         |      |        |         |      |    |       |      |        |      |         |       |        |
|   | ber   |      |       |       |      |         |      |        |         |      |    |       |      |        |      |         |       |        |
| 1 | 921   | Ab   | +     | +     | >204 | 64/32   |      | 128    | 128     | 1    |    | >1024 | 32   |        | 64   |         | 16    | 2      |
| 2 | 101   | Ab   | +     | +     | >204 | 64/32   |      | 256    | 64      | 1    |    | >1024 | 32   |        | 16   | 1024/4  | 32    | 1      |
| 3 | 103   | Ab   | +     | +     | >204 |         | 32   | 256    | 64      | 1    | 32 | >1024 | 32   | 4      | 64   | 256/4   | 16    | 2      |
| 4 | 160   | Ab   | +     | +     | >32  |         |      |        | >2      | 1    |    | >8    | 32   |        | 32   | >64     | 16    |        |
| 5 | 170   | Ab   | +     | +     | >204 |         | 32   | 512    | 256     | 1    |    | >1024 | 32   |        | 16   | 2048/4  | 8     | 0.5    |
| 6 | 296   | Ab   | +     | +     | >128 |         | >32  | >32    | 64      | 2    | 12 | >32   | 16   | 4      | 16   |         |       |        |
| 7 | 298   | Ab   | +     | +     | >204 | 128/6   |      |        |         |      |    |       |      |        |      |         |       |        |
| 8 | 299   | Ab   | +     | +     | >204 | 4       | 128  | 128    | 128     | 4    |    | >4096 | 64   |        | 128  | 4096/4  |       |        |
| 9 | 299   | Ab   | +     | +     | >204 | 4       | 128  | 512    | >8      | 4    | 32 | >4096 | 64   | 2      | 64   | 1024/4  |       |        |
| 1 | 361   | Ab   | +     | +     | >204 | 4       | 256  | 128    | 128     | 4    |    | >4096 | 64   |        | 128  | 4096/4  | 32    | 2      |
| 0 | 361   | Ab   | +     | +     | >204 | 4       | 64   | 512    | 256     | 4    | 64 | >1024 | 32   | 4      | 64   | 1024/4  |       |        |

**Note:** *A. baumannii* 14B0091 BCRC(<https://catalog.bcrc.firdi.org.tw/BcrcContent?bid=14B0091&rowid=1>) resistance to Ampicillin, Cefazolin, Cefoxitin, Ceftazidime, Ceftriaxone, Ciprofloxacin, Penicillin, Tetracycline, Imipenem. 2088 is resistant to meropenem and doxycycline.

TP2-5 HPLC

Sample Description:

Structure: KP-22

Number: 0200046

Lot No: P200330-SY786185

Column: 4.6mm\*250mm, Inertsil ODS-SP

Solvent A: 0.1% Trifluoroacetic in 100% Acetonitrile

Solvent B: 0.1% Trifluoroacetic in 100% Water

|           |      |     |
|-----------|------|-----|
| Gradient: | A    | B   |
| 0.01min   | 15%  | 85% |
| 25.00min  | 40%  | 60% |
| 25.01min  | 100% | 0%  |
| 30.00min  | Stop |     |

Flow rate: 1.0ml/min

Wavelength: 220nm

Volume: 10 µl

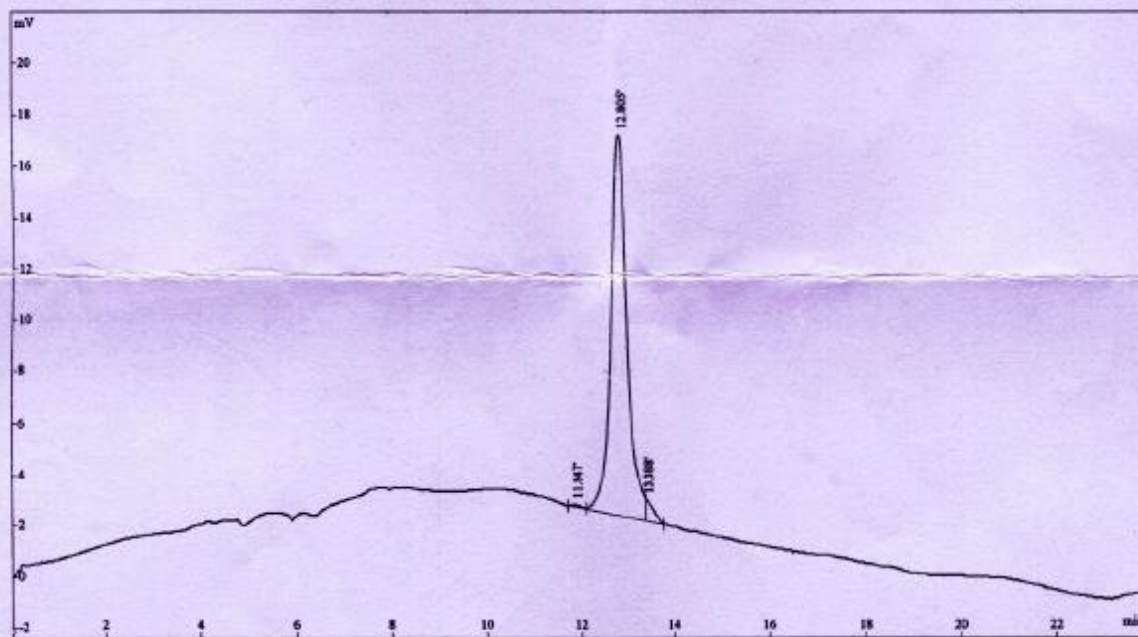

| Rank  | Time   | Conc.  | Area   | Height |
|-------|--------|--------|--------|--------|
| 1     | 11.847 | 0.4914 | 1736   | 117    |
| 2     | 12.805 | 97.35  | 344015 | 14854  |
| 3     | 13.388 | 2.155  | 7614   | 780    |
| Total |        | 100    | 353365 | 15751  |

Supplementary Figure S1: HPLC profile of TP2-5

TP2-5 Mass spectrometry

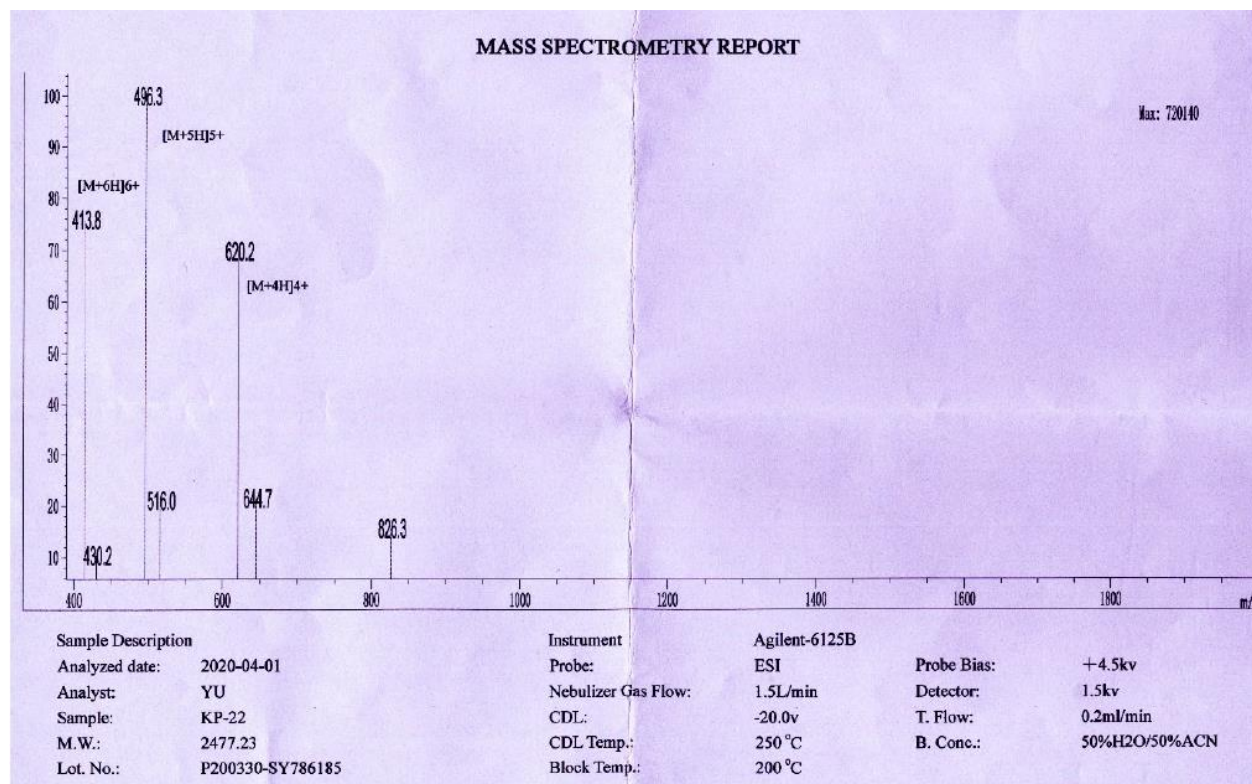

Supplementary Figure S2: Mass spectrometry profile of TP2-5

TP2-6 HPLC



## TP2-6 (KP-22) REPORT

Product Name: KP-22

Instrument No: 0200047

Lot No : P200929-MX786186

Column : 4.6\*250mm, kromasil C18-5

Solvent A : 0.1% Trifluoroacetic in 100% Acetonitrile

Solvent B : 0.1% Trifluoroacetic in 100% Water

|            |         |         |
|------------|---------|---------|
| Gradient : | A       | B       |
|            | 0.01min | 30% 70% |
|            | 25min   | 55% 45% |
|            | 25.1min | 100% 0% |
|            | 30min   | Stop    |

Flow rate : 1.0ml/min

Wavelength : 220nm

Volume: 5ul

File opened: F:786186-30-55.hw, where

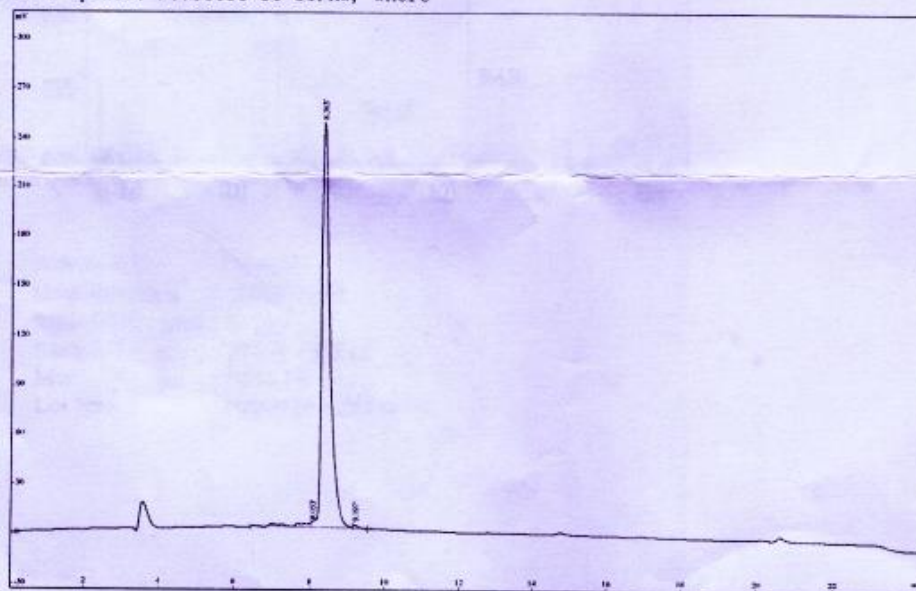

| Rank  | Time  | Conc.  | Area    | Height |
|-------|-------|--------|---------|--------|
| 1     | 8.053 | 3.198  | 121326  | 3112   |
| 2     | 8.363 | 96.26  | 3651605 | 246979 |
| 3     | 9.197 | 0.5481 | 20793   | 2030   |
| Total |       | 100    | 3793724 | 252121 |

Supplementary Figure S3 : HPLC profile of TP2-6

TP2-6 Mass spectrometry

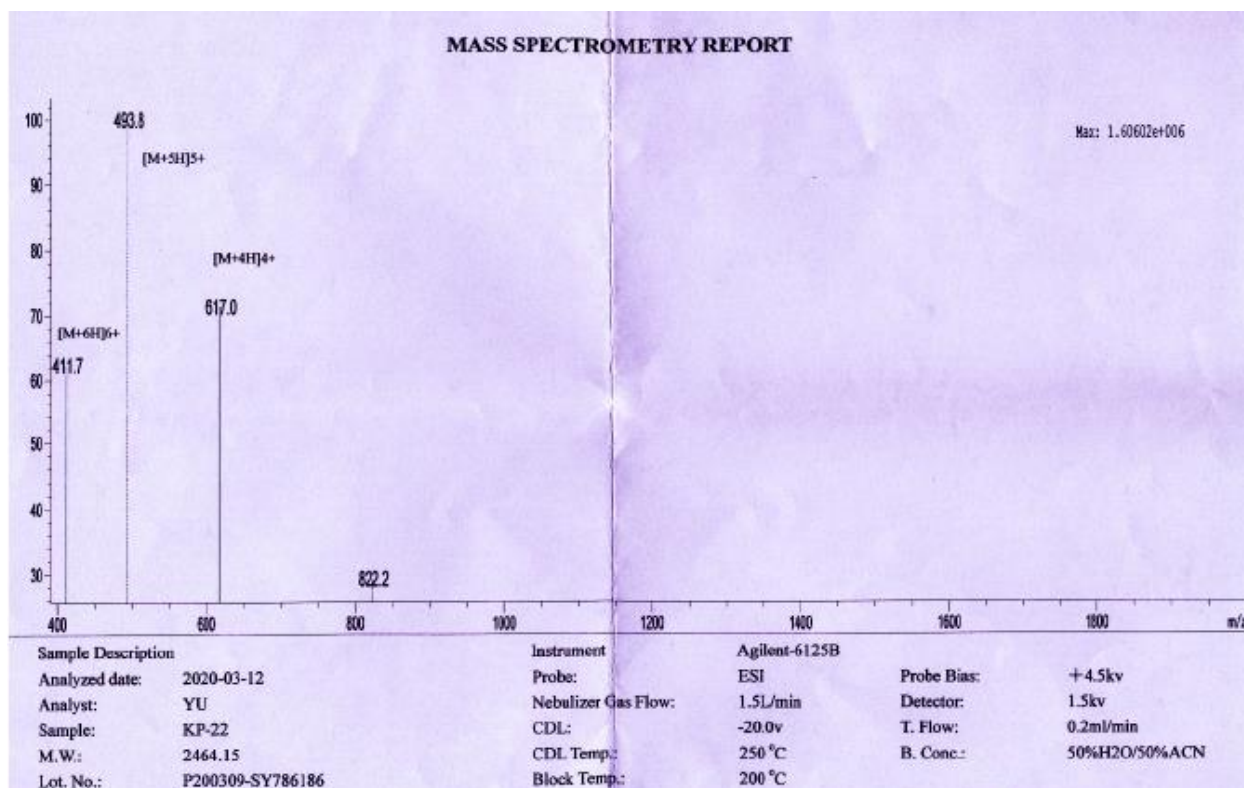

Supplementary Figure S4: Mass spectrometry profile of TP2-6
